# Supplementary material for: Interfacial interactions of humic acids with polystyrene nano-plastics in aqueous/ionic environments: a molecular dynamics exploration
Source: Royal Society of Chemistry journal article supplement (doi:10.1039/d2en00916a), 2023-01-01
Supplement: d2en00916a1.pdf [file d2en00916a1.pdf]

## **Supporting Information**

# **Interfacial Interactions of Humic Acids with Polystyrene Nano-plastics in Aqueous/Ionic Environments: A Molecular dynamics exploration**

Prasad Rama<sup>1\*</sup>, Julián A. Gallego-Urrea<sup>2</sup> and Zareen Abbas<sup>1</sup>,

<sup>1</sup>Department of Chemistry and Molecular Biology  
University of Gothenburg, Gothenburg – 40530, SWEDEN

<sup>2</sup>Department of Marine Science  
University of Gothenburg

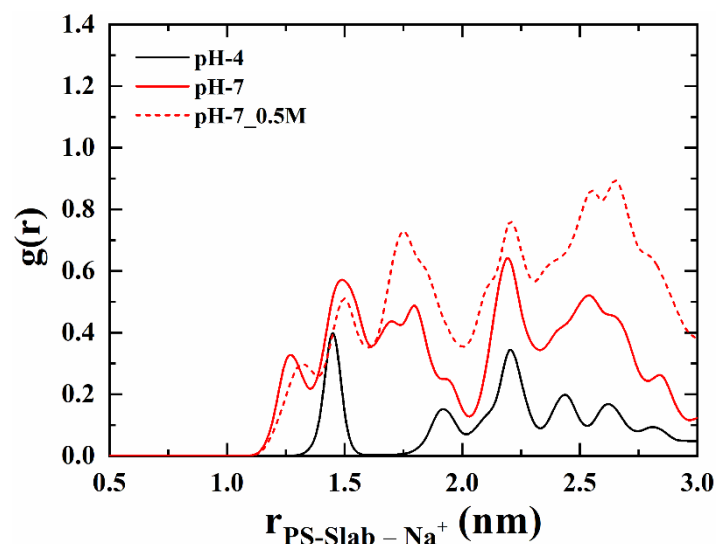

**Figure S1.** Radial number density distribution of  $\text{Na}^+$  ions at the geometric interface of PS-Slab

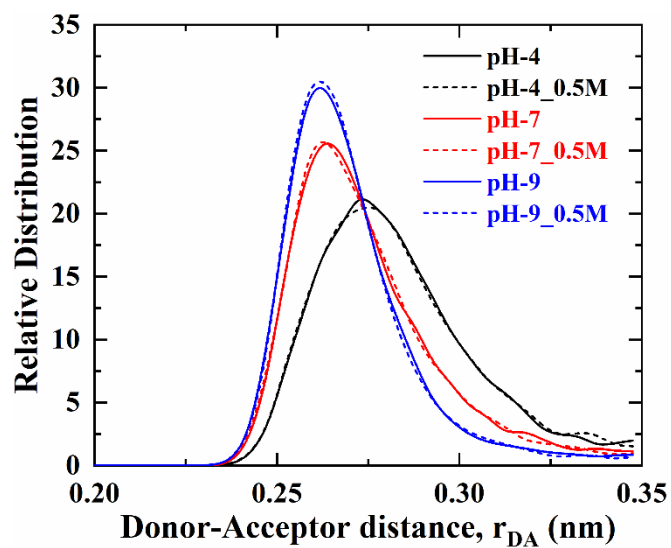

**Figure S2.** Donor-Acceptor distance for h-bonds formed at the geometric interface of PS-Slab
